# Supplementary material for: Strengthening the community support group to improve maternal and neonatal health seeking behaviors: A cluster-randomized controlled trial in Satkhira District, Bangladesh
Source: PubMed Central journal article supplement (PMC6394907; doi:10.1371/journal.pone.0212847), 2019-02-28
Supplement: pone.0212847.s001.pdf [file pone.0212847.s001.pdf]

**Table 1: CONSORT 2010 checklist of information to include when reporting a cluster randomised trial**

Strengthening the Community Support Group to improve maternal and neonatal health seeking behaviours: A cluster-randomized controlled trial in Satkhira District, Bangladesh, by Tobe RG et al.

| Section/Topic                    | Item No | Standard Checklist item                                                                                                                | Extension for cluster designs                                                                 | Page No * |
|----------------------------------|---------|----------------------------------------------------------------------------------------------------------------------------------------|-----------------------------------------------------------------------------------------------|-----------|
| <b>Title and abstract</b>        |         |                                                                                                                                        |                                                                                               |           |
|                                  | 1a      | Identification as a randomised trial in the title                                                                                      | Identification as a cluster randomised trial in the title                                     | pp.1      |
|                                  | 1b      | Structured summary of trial design, methods, results, and conclusions (for specific guidance see CONSORT for abstracts) <sup>1,2</sup> | See table 2                                                                                   | pp.2-3    |
| <b>Introduction</b>              |         |                                                                                                                                        |                                                                                               |           |
| <b>Background and objectives</b> | 2a      | Scientific background and explanation of rationale                                                                                     | Rationale for using a cluster design                                                          | pp.6      |
|                                  | 2b      | Specific objectives or hypotheses                                                                                                      | Whether objectives pertain to the the cluster level, the individual participant level or both | pp.6      |
| <b>Methods</b>                   |         |                                                                                                                                        |                                                                                               |           |
| <b>Trial design</b>              | 3a      | Description of trial design (such as parallel, factorial) including allocation ratio                                                   | Definition of cluster and description of how the design features apply to the clusters        | pp.7-8    |
|                                  | 3b      | Important changes to methods after trial commencement (such as eligibility criteria), with reasons                                     |                                                                                               |           |
| <b>Participants</b>              | 4a      | Eligibility criteria for participants                                                                                                  | Eligibility criteria for clusters                                                             | pp.7-8    |
|                                  | 4b      | Settings and locations where the data were collected                                                                                   |                                                                                               | pp.7-8    |
| <b>Interventions</b>             | 5       | The interventions for each group with sufficient details                                                                               | Whether interventions pertain to the cluster level, the individual                            | pp.8-9    |

|                                         |    |                                                                                                                                                                                             |                                                                                                                                                                                                                    |          |
|-----------------------------------------|----|---------------------------------------------------------------------------------------------------------------------------------------------------------------------------------------------|--------------------------------------------------------------------------------------------------------------------------------------------------------------------------------------------------------------------|----------|
|                                         |    | to allow replication, including how and when they were actually administered                                                                                                                | participant level or both                                                                                                                                                                                          |          |
| <b>Outcomes</b>                         | 6a | Completely defined pre-specified primary and secondary outcome measures, including how and when they were assessed                                                                          | Whether outcome measures pertain to the cluster level, the individual participant level or both                                                                                                                    | pp.10-11 |
|                                         | 6b | Any changes to trial outcomes after the trial commenced, with reasons                                                                                                                       |                                                                                                                                                                                                                    |          |
| <b>Sample size</b>                      | 7a | How sample size was determined                                                                                                                                                              | Method of calculation, number of clusters(s) (and whether equal or unequal cluster sizes are assumed), cluster size, a coefficient of intracluster correlation (ICC or $k$ ), and an indication of its uncertainty | pp.7-8   |
|                                         | 7b | When applicable, explanation of any interim analyses and stopping guidelines                                                                                                                |                                                                                                                                                                                                                    |          |
| <b>Randomisation:</b>                   |    |                                                                                                                                                                                             |                                                                                                                                                                                                                    |          |
| <b>Sequence generation</b>              | 8a | Method used to generate the random allocation sequence                                                                                                                                      |                                                                                                                                                                                                                    | pp.8     |
|                                         | 8b | Type of randomisation; details of any restriction (such as blocking and block size)                                                                                                         | Details of stratification or matching if used                                                                                                                                                                      | pp.8     |
| <b>Allocation concealment mechanism</b> | 9  | Mechanism used to implement the random allocation sequence (such as sequentially numbered containers), describing any steps taken to conceal the sequence until interventions were assigned | Specification that allocation was based on clusters rather than individuals and whether allocation concealment (if any) was at the cluster level, the individual participant level or both                         | pp.8     |
| <b>Implementation</b>                   | 10 | Who generated the random allocation sequence, who enrolled participants, and who assigned participants                                                                                      | Replace by 10a, 10b and 10c                                                                                                                                                                                        | pp.8     |

|                            |                                                             |                                                                                                                                                                     |                                                                                                                                        |                                                                                                                                                             |
|----------------------------|-------------------------------------------------------------|---------------------------------------------------------------------------------------------------------------------------------------------------------------------|----------------------------------------------------------------------------------------------------------------------------------------|-------------------------------------------------------------------------------------------------------------------------------------------------------------|
| to interventions           |                                                             |                                                                                                                                                                     |                                                                                                                                        |                                                                                                                                                             |
|                            | 10a                                                         | Who generated the random allocation sequence, who enrolled clusters, and who assigned clusters to interventions                                                     |                                                                                                                                        |                                                                                                                                                             |
|                            | 10b                                                         | Mechanism by which individual participants were included in clusters for the purposes of the trial (such as complete enumeration, random sampling)                  |                                                                                                                                        |                                                                                                                                                             |
|                            | 10c                                                         | From whom consent was sought (representatives of the cluster, or individual cluster members, or both), and whether consent was sought before or after randomisation |                                                                                                                                        |                                                                                                                                                             |
| <b>Blinding</b>            |                                                             |                                                                                                                                                                     |                                                                                                                                        |                                                                                                                                                             |
|                            | 11a                                                         | If done, who was blinded after assignment to interventions (for example, participants, care providers, those assessing outcomes) and how                            |                                                                                                                                        | pp.8                                                                                                                                                        |
|                            | 11b                                                         | If relevant, description of the similarity of interventions                                                                                                         |                                                                                                                                        |                                                                                                                                                             |
| <b>Statistical methods</b> |                                                             |                                                                                                                                                                     |                                                                                                                                        |                                                                                                                                                             |
|                            | 12a                                                         | Statistical methods used to compare groups for primary and secondary outcomes                                                                                       | How clustering was taken into account                                                                                                  | pp.11-12                                                                                                                                                    |
|                            | 12b                                                         | Methods for additional analyses, such as subgroup analyses and adjusted analyses                                                                                    |                                                                                                                                        |                                                                                                                                                             |
| <b>Results</b>             |                                                             |                                                                                                                                                                     |                                                                                                                                        |                                                                                                                                                             |
|                            | <b>Participant flow (a diagram is strongly recommended)</b> | 13a                                                                                                                                                                 | For each group, the numbers of participants who were randomly assigned, received intended treatment, and were analysed for the primary | For each group, the numbers of clusters that were randomly assigned, received intended treatment, and were analysed for the primary outcome <b>Figure 1</b> |

|                                |     |                                                                                                                                                   |                                                                                                                                            |          |
|--------------------------------|-----|---------------------------------------------------------------------------------------------------------------------------------------------------|--------------------------------------------------------------------------------------------------------------------------------------------|----------|
|                                |     | outcome                                                                                                                                           |                                                                                                                                            |          |
|                                | 13b | For each group, losses and exclusions after randomisation, together with reasons                                                                  | For each group, losses and exclusions for both clusters and individual cluster members                                                     | Figure 1 |
| <b>Recruitment</b>             | 14a | Dates defining the periods of recruitment and follow-up                                                                                           |                                                                                                                                            | pp.13    |
|                                | 14b | Why the trial ended or was stopped                                                                                                                |                                                                                                                                            |          |
| <b>Baseline data</b>           | 15  | A table showing baseline demographic and clinical characteristics for each group                                                                  | Baseline characteristics for the individual and cluster levels as applicable for each group                                                | pp.13    |
| <b>Numbers analysed</b>        | 16  | For each group, number of participants (denominator) included in each analysis and whether the analysis was by original assigned groups           | For each group, number of clusters included in each analysis                                                                               | pp.13    |
| <b>Outcomes and estimation</b> | 17a | For each primary and secondary outcome, results for each group, and the estimated effect size and its precision (such as 95% confidence interval) | Results at the individual or cluster level as applicable and a coefficient of intracluster correlation (ICC or k) for each primary outcome | pp.13-14 |
|                                | 17b | For binary outcomes, presentation of both absolute and relative effect sizes is recommended                                                       |                                                                                                                                            | pp.13-14 |
| <b>Ancillary analyses</b>      | 18  | Results of any other analyses performed, including subgroup analyses and adjusted analyses, distinguishing pre-specified from exploratory         |                                                                                                                                            | N.A.     |
| <b>Harms</b>                   | 19  | All important harms or unintended effects in each group (for specific guidance see CONSORT for harms <sup>3</sup> )                               |                                                                                                                                            | N.A      |
| <b>Discussion</b>              |     |                                                                                                                                                   |                                                                                                                                            |          |
| <b>Limitations</b>             | 20  | Trial limitations, addressing sources of potential bias,                                                                                          |                                                                                                                                            | pp.17    |

|                          |    |                                                                                                               |                                                                           |
|--------------------------|----|---------------------------------------------------------------------------------------------------------------|---------------------------------------------------------------------------|
|                          |    | imprecision, and, if relevant, multiplicity of analyses                                                       |                                                                           |
| <b>Generalisability</b>  | 21 | Generalisability (external validity, applicability) of the trial findings                                     | Generalisability to clusters and/or individual participants (as relevant) |
| <b>Interpretation</b>    | 22 | Interpretation consistent with results, balancing benefits and harms, and considering other relevant evidence | pp.15-17                                                                  |
| <b>Other information</b> |    |                                                                                                               |                                                                           |
| <b>Registration</b>      | 23 | Registration number and name of trial registry                                                                | pp.12                                                                     |
| <b>Protocol</b>          | 24 | Where the full trial protocol can be accessed, if available                                                   | N.A.                                                                      |
| <b>Funding</b>           | 25 | Sources of funding and other support (such as supply of drugs), role of funders                               | pp.12                                                                     |

\* Note: page numbers optional depending on journal requirements

**Table 2: Extension of CONSORT for abstracts<sup>1,2</sup> to reports of cluster randomised trials**

| Item                      | Standard Checklist item                                                                                     | Extension for cluster trials                                                                                   |
|---------------------------|-------------------------------------------------------------------------------------------------------------|----------------------------------------------------------------------------------------------------------------|
| <b>Title</b>              | Identification of study as randomised                                                                       | <b>Identification of study as cluster randomised</b>                                                           |
| <b>Trial design</b>       | Description of the trial design (e.g. parallel, cluster, non-inferiority)                                   |                                                                                                                |
| <b>Methods</b>            |                                                                                                             |                                                                                                                |
| <b>Participants</b>       | Eligibility criteria for participants and the settings where the data were collected                        | <b>Eligibility criteria for clusters</b>                                                                       |
| <b>Interventions</b>      | Interventions intended for each group                                                                       |                                                                                                                |
| <b>Objective</b>          | Specific objective or hypothesis                                                                            | <b>Whether objective or hypothesis pertains to the cluster level, the individual participant level or both</b> |
| <b>Outcome</b>            | Clearly defined primary outcome for this report                                                             | <b>Whether the primary outcome pertains to the cluster level, the individual participant level or both</b>     |
| <b>Randomization</b>      | How participants were allocated to interventions                                                            | <b>How clusters were allocated to interventions</b>                                                            |
| <b>Blinding (masking)</b> | Whether or not participants, care givers, and those assessing the outcomes were blinded to group assignment |                                                                                                                |
| <b>Results</b>            |                                                                                                             |                                                                                                                |
| <b>Numbers randomized</b> | Number of participants randomized to each group                                                             | <b>Number of clusters randomized to each group</b>                                                             |
| <b>Recruitment</b>        | Trial status <sup>1</sup>                                                                                   |                                                                                                                |
| <b>Numbers analysed</b>   | Number of participants analysed in each group                                                               | <b>Number of clusters analysed in each group</b>                                                               |
| <b>Outcome</b>            | For the primary outcome, a result for each group and the estimated effect size and its precision            | <b>Results at the cluster or individual participant level as applicable for each primary outcome</b>           |
| <b>Harms</b>              | Important adverse events or side effects                                                                    |                                                                                                                |
| <b>Conclusions</b>        | General interpretation of the results                                                                       |                                                                                                                |
| <b>Trial registration</b> | Registration number and name of trial register                                                              |                                                                                                                |
| <b>Funding</b>            | Source of funding                                                                                           |                                                                                                                |

<sup>1</sup> Relevant to Conference Abstracts

## REFERENCES

---

- <sup>1</sup> Hopewell S, Clarke M, Moher D, Wager E, Middleton P, Altman DG, et al. CONSORT for reporting randomised trials in journal and conference abstracts. *Lancet* 2008, 371:281-283
- <sup>2</sup> Hopewell S, Clarke M, Moher D, Wager E, Middleton P, Altman DG at al (2008) CONSORT for reporting randomized controlled trials in journal and conference abstracts: explanation and elaboration. *PLoS Med* 5(1): e20
- <sup>3</sup> Ioannidis JP, Evans SJ, Gotzsche PC, O'Neill RT, Altman DG, Schulz K, Moher D. Better reporting of harms in randomized trials: an extension of the CONSORT statement. *Ann Intern Med* 2004; 141(10):781-788.
