# Supplementary material for: Strengthening the community support group to improve maternal and neonatal health seeking behaviors: A cluster-randomized controlled trial in Satkhira District, Bangladesh
Source: PubMed Central journal article supplement (PMC6394907; doi:10.1371/journal.pone.0212847), 2019-02-28
Supplement: pone.0212847.s005.pdf [file pone.0212847.s005.pdf]

## UMIN UMIN-CTR 臨床試験登録情報の閲覧

[BACK](#) [TOP](#) [UMIN-CTR ホーム](#) [用語の説明\(簡易版\)](#) [用語の説明\(詳細版\)](#) --準備中 [FAQ](#)

利用者名: GAI RUOYAN UMIN ID: gai-r

試験進捗状況 参加者募集終了-試験継続中/No longer recruiting  
 UMIN試験ID UMIN000031789  
 受付番号 R000036286  
 試験名 バングラデシュ国における母性保護サービス強化プロジェクト(SMPP)フェーズ2の評価研究  
 一般公開日(本登録希望日) 2018/05/31  
 最終更新日 2019/01/31

※ 本ページ記載の情報は、臨床試験に関する情報公開を目的として、UMINが開設しているUMIN臨床試験登録システムに提供された臨床試験情報です。

※ 特定の医薬品や治療法等については、医療関係者や一般の方に向けて広告することは目的としていません。

| 基本情報/Basic information                     |                                              |                                                                                                |
|--------------------------------------------|----------------------------------------------|------------------------------------------------------------------------------------------------|
| 試験名/Official scientific title of the study | バングラデシュ国における母性保護サービス強化プロジェクト(SMPP)フェーズ2の評価研究 | Interventional study on the impact of safe motherhood promotion project Phase II in Bangladesh |
| 試験簡略名/Title of the study (Brief title)     | バングラデシュ国におけるSMPP評価研究                         | JICA SMPP II in Bangladesh                                                                     |
| 試験実施地域/Region                              | アジア(日本以外)/Asia(except Japan)                 |                                                                                                |

| 対象疾患/Condition                     |                     |                                         |
|------------------------------------|---------------------|-----------------------------------------|
| 対象疾患名/Condition                    | 母子保健指標              | Maternal and neonatal health indicators |
| 疾患区分1/Classification by specialty  | 該当せず/Not applicable |                                         |
| 疾患区分2/Classification by malignancy | 悪性腫瘍以外/Others       |                                         |
| ゲノム情報の取扱い/Genomic information      | いいえ/NO              |                                         |

| 目的/Objectives                       |                                                                   |                                                                                                                                                              |
|-------------------------------------|-------------------------------------------------------------------|--------------------------------------------------------------------------------------------------------------------------------------------------------------|
| 目的1/Narrative objectives1           | バングラデシュ国シャトキラ県コロロア郡で実施されたSMPPの介入の母子保健サービス利用や母子保健指標の改善に関する効果を検証する。 | To assess the effectiveness of SMPP intervention in Kalaroa Upazila, Satkhira District on improving maternal and neonatal indicators and service utilization |
| 目的2/Basic objective s2              | 安全性・有効性/Safety,Efficacy                                           |                                                                                                                                                              |
| 目的2 -その他詳細/Basic objectives -Others |                                                                   |                                                                                                                                                              |
| 試験の性質1/Trial characteristics_1      | 検証的/Confirmatory                                                  |                                                                                                                                                              |
| 試験の性質2/Trial characteristics_2      | 実務的/Pragmatic                                                     |                                                                                                                                                              |
| 試験のフェーズ/Developmental phase         | 該当せず/Not applicable                                               |                                                                                                                                                              |

| 評価/Assessment                      |                                                                                                                                                                                                                                                                          |                                                                                                                                                                                                                                                                                                                                                                                                                                                                                                                                                                                                                                                                                                                                  |
|------------------------------------|--------------------------------------------------------------------------------------------------------------------------------------------------------------------------------------------------------------------------------------------------------------------------|----------------------------------------------------------------------------------------------------------------------------------------------------------------------------------------------------------------------------------------------------------------------------------------------------------------------------------------------------------------------------------------------------------------------------------------------------------------------------------------------------------------------------------------------------------------------------------------------------------------------------------------------------------------------------------------------------------------------------------|
| 主要アウトカム評価項目/Primary outcomes       | <ul style="list-style-type: none"> <li>・研究対象となる妊婦が妊娠期間中に専門の技能を持つスタッフによる健診を4回以上を受ける割合;</li> <li>・専門の技能を持つスタッフの介助による分娩を受ける割合;</li> <li>・施設分娩の割合;</li> <li>・産科救急ケアの利用率;</li> <li>・専門の技能を持つスタッフによる産後ケアの普及率;</li> <li>・新生児の疾患が起こる場合、専門の技能を持つスタッフによる新生児ケアサービスを受ける割合</li> </ul> | <ul style="list-style-type: none"> <li>- Proportion of targeted women (recently delivered women) received 4 or more ANC by skilled providers;</li> <li>- Proportion of deliveries attended by skilled birth attendants</li> <li>- Proportion of deliveries conducted at the health facilities (both public and private)</li> <li>- Proportion of women with complications during pregnancy/delivery/postpartum period utilized EmOC services (met need)</li> <li>- Proportion of targeted women received PNC within 42 days of delivery by skilled providers</li> <li>- Proportion of mother&amp;babies received neonatal care services from trained health providers (or health facilities) during neonatal sickness</li> </ul> |
| 副次アウトカム評価項目/Key secondary outcomes |                                                                                                                                                                                                                                                                          |                                                                                                                                                                                                                                                                                                                                                                                                                                                                                                                                                                                                                                                                                                                                  |

アウトカム評価項目には、可能な限り評価の時期の情報(例: 投与開始から12週後など)も含めてください。また、評価項目としては、単に「安全性」「有効性」などとするのではなく、実際に測定する検査項目の名称を具体的にご記入ください。また、主要アウトカム評価項目は最も主要な1項目のみとし、2項目以降は副次アウトカム評価項目としてください。

| 基本事項/Base        |                   |
|------------------|-------------------|
| 試験の種類/Study type | 介入/Interventional |

| 試験デザイン/Study design                 |                                                         |
|-------------------------------------|---------------------------------------------------------|
| 基本デザイン/Basic design                 | 並行群間比較/Parallel                                         |
| ランダム化/Randomization                 | ランダム化/Randomized                                        |
| ランダム化の単位/Randomization unit         | 集団/Cluster                                              |
| ブラインド化/Blinding                     | オープンだが測定者がブラインド化されている/Open -but assessor(s) are blinded |
| コントロール/Control                      | 無治療対照/No treatment                                      |
| 層別化/Stratification                  | はい/YES                                                  |
| 動的割付/Dynamic allocation             | いいえ/NO                                                  |
| 試験実施施設の考慮/Institution consideration |                                                         |
| ブロック化/Blocking                      | いいえ/NO                                                  |
| 割付コードを知る方法/Concealment              | 知る必要がない/No need to know                                 |

| 介入/Intervention               |                                                   |
|-------------------------------|---------------------------------------------------|
| 群数/No. of arms                | 2                                                 |
| 介入の目的/Purpose of intervention | 教育・カウンセリング・トレーニング/Educational,Counseling,Training |
|                               |                                                   |

|                               |                                                                                                                                 |                                                                                                                                                                                                                                                        |
|-------------------------------|---------------------------------------------------------------------------------------------------------------------------------|--------------------------------------------------------------------------------------------------------------------------------------------------------------------------------------------------------------------------------------------------------|
| 介入の種類/Type of intervention    | 行動・習慣/Behavior, custom                                                                                                          |                                                                                                                                                                                                                                                        |
| 介入1/Interventions/Control_1   | 母子保健サービス提供者のスキル・能力強化;<br>住民の組織化による主体的な安全なお産活動;<br>病院における母子保健サービスの質の改善;<br>地方行政機関との連携による母子保健啓発活動;<br>母子保健関連グッドプラクティスの他地域への普及・政策化 | Safe Motherhood Promotion through organizing communities,<br>Improvement of quality MNH services at hospitals,<br>Collaboration with local government bodies to mainstream MNH,<br>Replication and policy development of good practices related to MNH |
| 介入2/Interventions/Control_2   | 対照群は既存のサービスパッケージを実施                                                                                                             | The current service package                                                                                                                                                                                                                            |
| 介入3/Interventions/Control_3   |                                                                                                                                 |                                                                                                                                                                                                                                                        |
| 介入4/Interventions/Control_4   |                                                                                                                                 |                                                                                                                                                                                                                                                        |
| 介入5/Interventions/Control_5   |                                                                                                                                 |                                                                                                                                                                                                                                                        |
| 介入6/Interventions/Control_6   |                                                                                                                                 |                                                                                                                                                                                                                                                        |
| 介入7/Interventions/Control_7   |                                                                                                                                 |                                                                                                                                                                                                                                                        |
| 介入8/Interventions/Control_8   |                                                                                                                                 |                                                                                                                                                                                                                                                        |
| 介入9/Interventions/Control_9   |                                                                                                                                 |                                                                                                                                                                                                                                                        |
| 介入10/Interventions/Control_10 |                                                                                                                                 |                                                                                                                                                                                                                                                        |

介入1～10には、介入の期間(何日間投与、介入するか)、介入の量(投与量や線量など)、介入の回数、頻度など、内容を可能な限り詳しく記載してください。とくに、投薬や機器使用の介入の場合、期間は必ず含めてください。

| 適格性/Eligibility             |                            |                                                                       |
|-----------------------------|----------------------------|-----------------------------------------------------------------------|
| 年齢(下限)/Age-lower limit      | 15歳/years-old 以上/<=        |                                                                       |
| 年齢(上限)/Age-upper limit      | 49歳/years-old 以下/>=        |                                                                       |
| 性別/Gender                   | 女/Female                   |                                                                       |
| 選択基準/Key inclusion criteria | 対象地域で過去1年に出産を経験した女性(死産を含む) | Women who had child birth during last one year in the targeted areas. |
| 除外基準/Key exclusion criteria | 本プロジェクトに参加する意思がなし          | Not willing to participate in the project                             |
| 目標参加者数/Target sample size   | 2500                       |                                                                       |

| 責任研究者/Research contact person              |          |                                        |
|--------------------------------------------|----------|----------------------------------------|
| 責任研究者名/Name of lead principal investigator | 吉村幸江     | Yoshimura Yukie                        |
| 所属組織/Organization                          | 日本国際協力機構 | Japan International Cooperation Agency |

|                    |                                                                                 |                                                                                 |
|--------------------|---------------------------------------------------------------------------------|---------------------------------------------------------------------------------|
| 所属部署/Division name | バングラデシュ事務所                                                                      | Bangladesh Office                                                               |
| 住所/Address         | 3rd Floor, Bay's Galleria, 57 Gulshan Avenue, Gulshan 1, Dhaka 1212, Bangladesh | 3rd Floor, Bay's Galleria, 57 Gulshan Avenue, Gulshan 1, Dhaka 1212, Bangladesh |
| 電話/TEL             | +880-2-989-1897                                                                 |                                                                                 |
| Email/Email        | yoshiboubd@gmail.com                                                            |                                                                                 |

| 試験問い合わせ窓口/Public contact             |                       |                                                  |
|--------------------------------------|-----------------------|--------------------------------------------------|
| 試験問い合わせ窓口担当者名/Name of contact person | 森臨太郎                  | Mori Rintaro                                     |
| 組織名/Organization                     | 国立成育医療研究センター          | National Center for Child Health and Development |
| 部署名/Division name                    | 政策科学研究部               | Department of Health Policy                      |
| 住所/Address                           | 東京都世田谷区大蔵2-10-1       | Okura 2-10-1, Setagaya, Tokyo                    |
| 電話/TEL                               | +81.3.3416.0181       |                                                  |
| 試験のホームページURL/Homepage URL            |                       |                                                  |
| Email/Email                          | rintaromori@gmail.com |                                                  |

| 情報送信組織/Organization sending information |                   |                                                  |
|-----------------------------------------|-------------------|--------------------------------------------------|
| 送信者名/Name of person sending information | 蓋若エン              | Gai Ruoyan                                       |
| 情報送信組織/Organization                     | 国立成育医療研究センター      | National Center for Child Health and Development |
| 所属部署/Division name                      | 政策科学研究部           | Department of Health Policy                      |
| 住所/Address                              | 東京都世田谷区大蔵2-10-1   | Okura 2-10-1, Setagaya, Tokyo                    |
| 電話/TEL                                  | +81.3.3416.0181   |                                                  |
| Email/Email                             | gai-r@ncchd.go.jp |                                                  |

| 実施責任組織/Sponsor               |                   |                                        |
|------------------------------|-------------------|----------------------------------------|
| 機関名/Institute                | 独立行政法人国際協力機構(研究所) | Japan International Cooperation Agency |
| 機関名/Institute<br>(機関選択不可の場合) |                   |                                        |
| 部署名/Department               |                   |                                        |

実施責任組織に設定する適切な機関が存在しない場合は、「その他」を選択し、「機関名(機関選択不可の場合)」に実施責任組織の機関名、及び組織名を直接入力して下さい。

| 研究費提供組織/Funding Source          |                   |                                               |
|---------------------------------|-------------------|-----------------------------------------------|
| 機関名/Organization                | 独立行政法人国際協力機構(研究所) | Japan International Cooperation Agency (JICA) |
| 機関名/Organization<br>(機関選択不可の場合) |                   |                                               |

|                                            |                                    |       |
|--------------------------------------------|------------------------------------|-------|
| 組織名/Division                               |                                    |       |
| 組織の区分/Category of Funding Organization     | 日本の官庁/Japanese Governmental office |       |
| 研究費拠出国/Nationality of Funding Organization | 日本                                 | Japan |

研究費提供組織に設定する適切な機関が存在しない場合は、「その他」を選択し、「機関名(機関選択不可の場合)」に研究費提供組織の機関名、及び組織名を直接入力して下さい。

| その他の関連組織/Other related organizations    |              |                                                  |
|-----------------------------------------|--------------|--------------------------------------------------|
| 共同実施組織/Co-sponsor                       | 国立成育医療研究センター | National Center for Child Health and Development |
| その他の研究費提供組織/Name of secondary funder(s) |              |                                                  |

| IRB等連絡先/IRBs                                                                                                 |                                                                                                                    |
|--------------------------------------------------------------------------------------------------------------|--------------------------------------------------------------------------------------------------------------------|
| 倫理委員会による審査・承認/Research ethics review                                                                         | あり/YES                                                                                                             |
| 日本の法規に定める医薬品製造業者等による医薬品の市販後調査への該当/Post marketing survey by drug manufacture etc., specified by Japanese law. | 該当なし(医薬品製造業者等でない場合は、こちらを選択ください)/Not applicable (Chose this category if you are not drug manufacture etc. in Japan) |
| 組織名1/Organization1                                                                                           | 国立成育医療研究センター                                                                                                       |
| 住所1/Address1                                                                                                 | 東京都世田谷区大蔵2-10-1                                                                                                    |
| 電話1/Tel1                                                                                                     | 03-3416-0181                                                                                                       |
| Email1/Email1                                                                                                | rintaromori@gmail.com                                                                                              |
| 組織名2/Organization2                                                                                           |                                                                                                                    |
| 住所2/Address2                                                                                                 |                                                                                                                    |
| 電話2/Tel2                                                                                                     |                                                                                                                    |
| Email2/Email2                                                                                                |                                                                                                                    |
| 組織名3/Organization3                                                                                           |                                                                                                                    |
| 住所3/Address3                                                                                                 |                                                                                                                    |
| 電話3/Tel3                                                                                                     |                                                                                                                    |
| Email3/Email3                                                                                                |                                                                                                                    |

| 他機関から発行された試験ID/Secondary IDs |        |
|------------------------------|--------|
| 他機関から発行された試験ID/Secondary IDs | いいえ/NO |
| 試験ID1/Study ID_1             |        |

|                                         |  |
|-----------------------------------------|--|
| ID発行機関1/Org. issuing International ID_1 |  |
| 試験ID2/Study ID_2                        |  |
| ID発行機関2/Org. issuing International ID_2 |  |
| 治験届/IND to MHLW                         |  |

| 試験実施施設/Institutions   |  |
|-----------------------|--|
| 試験実施施設名称/Institutions |  |

| その他の管理情報/Other administrative information                 |             |
|-----------------------------------------------------------|-------------|
| 一般公開日(本登録希望日)/Date of disclosure of the study information | 2018年05月31日 |

| 試験進捗状況/Progress                                |                                    |
|------------------------------------------------|------------------------------------|
| 試験進捗状況/Recruitment status                      | 参加者募集終了-試験継続中/No longer recruiting |
| プロトコル確定日/Date of protocol fixation             | 2011年05月29日                        |
| 登録・組入れ開始(予定)日/Anticipated trial start date     | 2011年07月01日                        |
| フォロー終了(予定)日/Last follow-up date                | 2016年06月30日                        |
| 入力終了(予定)日/Date of closure to data entry        |                                    |
| データ固定(予定)日/Date trial data considered complete |                                    |
| 解析終了(予定)日/Date analysis concluded              |                                    |

| 関連情報/Related information          |                 |
|-----------------------------------|-----------------|
| プロトコル掲載URL/URL releasing protocol |                 |
| 試験結果の公開状況/Publication of results  | 未公表/Unpublished |
| 結果掲載URL/URL releasing results     |                 |
| 主な結果/Results                      |                 |
|                                   |                 |

|                                   |  |
|-----------------------------------|--|
| その他関連情報/Other related information |  |
|-----------------------------------|--|

| 更新許可者/UMIN user permitted to amend |  |
|------------------------------------|--|
| 更新許可者 UMIN ID1/UMIN ID1            |  |
| 更新許可者 UMIN ID2/UMIN ID2            |  |
| 更新許可者 UMIN ID3/UMIN ID3            |  |

| 管理情報/Management information                  |                   |
|----------------------------------------------|-------------------|
| UMIN試験ID/Unique ID issued by UMIN            | UMIN000031789     |
| 状態/Status                                    | 登録済み/Regist       |
| 初回申請者/Applicant for provisional registration | gai-r(GAI RUOYAN) |
| 申請日/Date of provisional registration         | 2018年03月19日       |
| 登録者/Registrant                               | gai-r(GAI RUOYAN) |
| 登録日時/Registered date                         | 2018年03月19日       |
| 最終更新者/Last modified by                       | gai-r(GAI RUOYAN) |
| 最終更新日/Last modified on                       | 2019年01月31日       |

| 閲覧ページへのリンク/Link to view the page |                                                                                                                                                                         |
|----------------------------------|-------------------------------------------------------------------------------------------------------------------------------------------------------------------------|
| URL(日本語)                         | <a href="https://upload.umin.ac.jp/cgi-open-bin/ctr/ctr_view.cgi?recptno=R000036286">https://upload.umin.ac.jp/cgi-open-bin/ctr/ctr_view.cgi?recptno=R000036286</a>     |
| URL(英語)                          | <a href="https://upload.umin.ac.jp/cgi-open-bin/ctr_e/ctr_view.cgi?recptno=R000036286">https://upload.umin.ac.jp/cgi-open-bin/ctr_e/ctr_view.cgi?recptno=R000036286</a> |

| 閲覧ページ(ICDR)へのリンク/Link to view the page(ICDR) |                                                                                                                                                               |
|----------------------------------------------|---------------------------------------------------------------------------------------------------------------------------------------------------------------|
| URL(日本語)                                     | <a href="https://upload.umin.ac.jp/cgi-bin/ctr/ctr_view.cgi?recptno=R000036286">https://upload.umin.ac.jp/cgi-bin/ctr/ctr_view.cgi?recptno=R000036286</a>     |
| URL(英語)                                      | <a href="https://upload.umin.ac.jp/cgi-bin/ctr_e/ctr_view.cgi?recptno=R000036286">https://upload.umin.ac.jp/cgi-bin/ctr_e/ctr_view.cgi?recptno=R000036286</a> |

| 研究計画書 |     |       |
|-------|-----|-------|
| 登録日時  | 登録者 | ファイル名 |
|       |     |       |

| 研究症例データ仕様書 |     |       |
|------------|-----|-------|
| 登録日時       | 登録者 | ファイル名 |
|            |     |       |

| 研究症例データ |     |       |
|---------|-----|-------|
| 登録日時    | 登録者 | ファイル名 |
|         |     |       |

戻る

---

UMIN臨床試験登録システムのご使用に関するお問い合わせは、[こちらのお問い合わせフォーム](#) からお願いいたします。それ以外のお問い合わせは、[こちら](#)よりお願い致します。



**UMIN** Infrastructure for Academic Activities  
University hospital Medical Information Network
